# Supplementary material for: Synthesis and characterization of designed BMHP1-derived self-assembling peptides for tissue engineering applications
Source: Royal Society of Chemistry journal article supplement (doi:10.1039/c2nr32656f), 2012-11-23
Supplement: c2nr32656f.pdf [file c2nr32656f.pdf]

**Supporting information:**

**Figure S1**

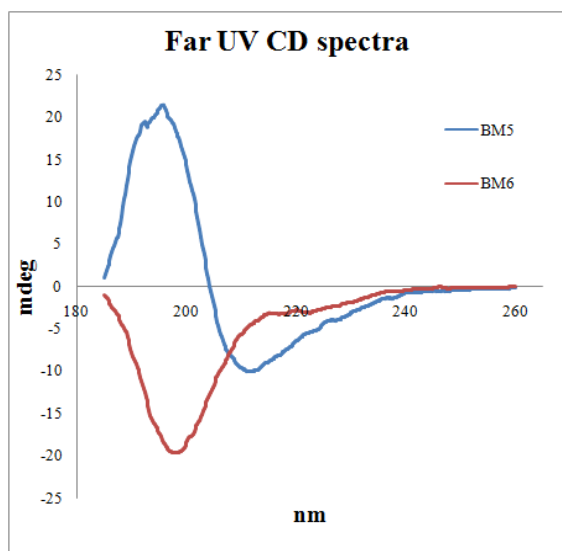

**Figure S1:** Comparison of Far UV CD spectra of BM5 and BM6 captured 20 minutes after dilution. BM5 displayed the spectral features of  $\beta$ -sheet structures while BM6 showed a pattern of mainly unordered aggregates.

**Table S1**

| DAY 1 |            |              |              |                | DAY 7 |              |              |                |                |
|-------|------------|--------------|--------------|----------------|-------|--------------|--------------|----------------|----------------|
| SAP   | FIBER TYPE | WIDTH (nm)   | HEIGHT (nm)  | PITCH (nm)     | SAP   | FIBER TYPE   | WIDTH (nm)   | HEIGHT (nm)    | PITCH (nm)     |
| BM1   | A)         | 17.72 ± 0.74 | 2.50 ± 0.10  |                | BM1   | A)           | 18.76 ± 0.91 | 2.20 ± 0.14    |                |
|       | B)         | 30.27 ± 0.98 | 2.46 ± 0.14  |                |       | B)           | 30.57 ± 0.97 | 2.47 ± 0.14    |                |
|       | C)         | 39.40 ± 1.19 | 2.63 ± 0.23  |                |       | C)           | 41.15 ± 1.33 | 2.53 ± 0.16    |                |
| BM2   | A)         | 18.28 ± 0.92 | 2.12 ± 0.14  |                | BM2   | A)           | 18.15 ± 0.75 | 2.14 ± 0.10    |                |
|       | B)         | 18.44 ± 0.83 | 3.63 ± 0.10  |                |       | C)           | 29.31 ± 0.91 | 2.58 ± 0.12    |                |
|       | C)         | 29.32 ± 1.08 | 3.71 ± 0.11  |                |       | D)           | 30.23 ± 0.57 | 4.67 ± 0.11    |                |
|       |            |              |              | B)             |       | 17.33 ± 0.76 | 3.94 ± 0.13  |                |                |
| BM3   | A)         | 8.06 ± 0.73  | 2.53 ± 0.43  |                | BM3   | D)*          | 28.51 ± 1.24 | 4.12 ± 0.23    | 123.37 ± 10.98 |
|       | B)         | 16.84 ± 0.79 | 3.75 ± 0.40  |                |       |              | 29.75 ± 1.13 | 6.31 ± 0.31    |                |
|       | C)         | 28.47 ± 1.10 | 4.11 ± 0.36  |                |       |              |              |                |                |
| BM4   | A)         | 8.81 ± 0.43  | 1.97 ± 0.15  |                | BM4   | B)           | 18.59 ± 1.44 | 2.63 ± 0.09    |                |
|       | B)         | 16.60 ± 0.57 | 2.81 ± 0.30  |                |       | C)           | 32.91 ± 1.08 | 2.94 ± 0.12    |                |
|       | C)         | 30.17 ± 1.10 | 3.21 ± 0.27  |                |       | D)           | 49.66 ± 1.02 | 3.38 ± 0.18    |                |
|       | D)         | 46.08 ± 1.54 | 3.69 ± 0.26  |                |       | E)           | 77.36 ± 3.18 | 2.90 ± 0.18    |                |
|       | E)         | 76.25 ± 1.59 | 3.14 ± 0.19  |                |       |              |              |                |                |
| BM5   | A)         | 16.62 ± 1.09 | 2.46 ± 0.23  |                | BM5   | E)*          | 16.88 ± 0.59 | 6.70 ± 0.15    | 114.54 ± 10.61 |
|       | B)         | 16.31 ± 0.59 | 4.42 ± 0.20  |                |       |              | 17.33 ± 0.68 | 4.30 ± 0.17    |                |
|       | C)         | 31.48 ± 1.50 | 4.05 ± 0.21  |                |       | B)           | 18.52 ± 1.19 | 4.64 ± 0.25    |                |
|       |            |              |              | C)             |       | 30.27 ± 1.24 | 5.24 ± 0.26  |                |                |
|       |            |              |              | D)             |       | 48.62 ± 1.86 | 5.07 ± 0.25  |                |                |
|       |            |              |              | C)             |       | 16.05 ± 0.73 | 5.30 ± 0.32  |                |                |
| BM6   | A)         | 17.36 ± 0.58 | 1.78 ± 0.06  |                | BM6   | F)*          | 17.07 ± 0.73 | 6.73 ± 0.28    | 222.25 ± 22.75 |
|       | B)         | 17.57 ± 0.75 | 2.55 ± 0.10  |                |       |              | 17.75 ± 0.85 | 11.13 ± 0.28   |                |
|       | C)         | 19.71 ± 1.00 | 5.45 ± 0.31  |                |       | E)           | 29.07 ± 0.41 | 6.29 ± 0.17    | 223.22 ± 21.61 |
|       | D)*        | 18.57 ± 0.30 | 3.84 ± 0.03  | 112.20 ± 6.39  |       | G)*          | 29.48 ± 0.85 | 7.24 ± 0.15    |                |
|       |            | 18.87 ± 0.48 | 5.74 ± 0.19  |                |       |              |              | 29.60 ± 1.11   |                |
|       | E)         | 29.37 ± 1.02 | 5.62 ± 0.27  |                |       |              |              |                |                |
| BM7   | A)         | 17.38 ± 0.62 | 3.06 ± 0.15  |                | BM7   | D)           | 16.08 ± 0.52 | 1.61 ± 0.08    | 124.58 ± 8.90  |
|       | B)         | 17.86 ± 0.78 | 7.12 ± 0.34  |                |       | E)           | 17.47 ± 0.50 | 5.09 ± 0.47    |                |
|       | C)         | 29.66 ± 0.86 | 6.22 ± 0.69  |                |       | F)*          | 15.41 ± 0.29 | 3.35 ± 0.12    |                |
|       |            |              |              |                |       |              | 16.08 ± 0.45 | 5.98 ± 0.23    |                |
|       |            |              |              |                |       | C)           | 27.71 ± 0.71 | 6.39 ± 0.40    |                |
|       |            |              |              | G)             |       | 28.80 ± 0.31 | 3.58 ± 0.05  |                |                |
|       |            |              |              | H)             |       | 40.24 ± 4.44 | 14.85 ± 1.49 |                |                |
|       |            |              |              | I)             |       | 75.66 ± 8.42 | 4.15 ± 0.35  |                |                |
|       |            |              |              |                |       |              |              |                |                |
|       |            |              |              |                |       |              |              |                |                |
| BM8   | A)         | 17.50 ± 0.82 | 6.21 ± 0.32  |                | BM8   | E)           | 16.95 ± 0.61 | 7.92 ± 0.43    | 254.71 ± 25.49 |
|       | B)         | 17.05 ± 0.56 | 9.54 ± 0.32  |                |       | F)           | 29.75 ± 1.19 | 12.77 ± 1.35   |                |
|       | C)         | 29.36 ± 1.03 | 6.48 ± 0.31  |                |       | D)*          | 30.05 ± 0.82 | 8.28 ± 0.63    |                |
|       | D)*        | 29.16 ± 0.73 | 9.86 ± 0.42  | 262.30 ± 62.63 |       |              | 30.70 ± 0.77 | 15.01 ± 1.44   |                |
|       |            | 32.35 ± 1.64 | 15.43 ± 0.83 |                |       |              | G)*          | 29.28 ± 1.14   | 7.02 ± 0.37    |
|       |            |              |              |                |       | 29.4 ± 0.32  | 9.30 ± 0.20  | 177.33 ± 34.00 |                |
|       |            |              |              | H)             |       | 41.69 ± 2.25 | 12.05 ± 1.66 |                |                |

**Table S1:** AFM measurements. Capital letters designate the fiber population and \* is reported for twisted fibers, underlined letters indicates the population of fiber preserved from day 1 to day 7. Reported values stand for mean ± standard error of the mean (*SEM*) obtained at day 1 and day 7.
